# Supplementary material
Source: PubMed Central journal article supplement (PMC10511358)

Suppl. Mat. Fig. 1: Workflow diagram of the bibliometric analysis

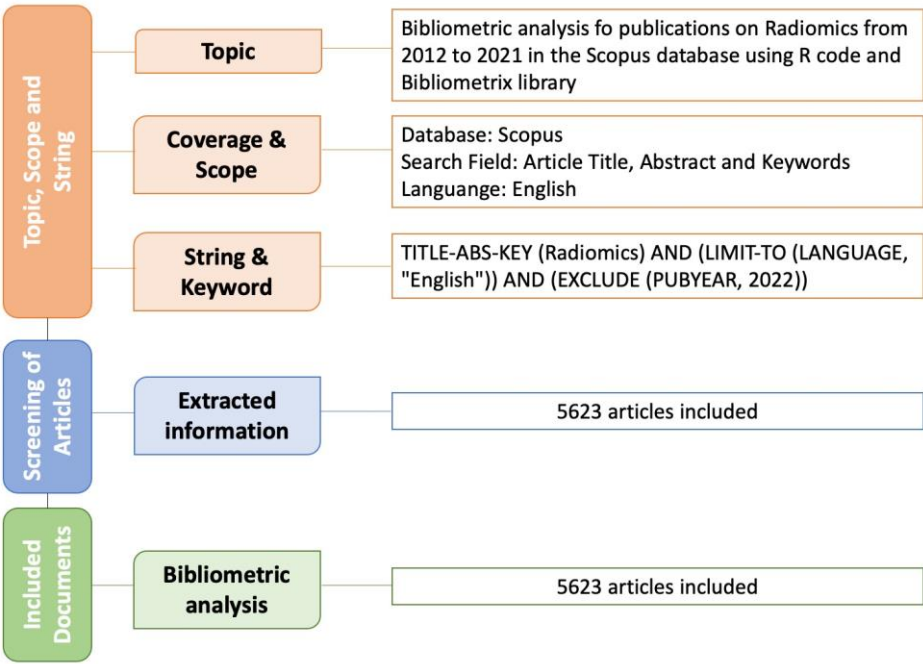

Supplement: 330_2023_9645_MOESM1_ESM.pdf [file 330_2023_9645_MOESM1_ESM.pdf]
